# Supplementary material for: The Elemental Fingerprints of Different Types of Whisky as Determined by ICP-OES and ICP-MS Techniques in Relation to Their Type, Age, and Origin
Source: MDPI journal article supplement (doi:10.3390/foods11111616), 2022-05-30
Supplement: s1 [file s1]

**Table S1.** ICP-MS (Thermo Electron Corporation, X SERIES, East Lyme, CT, USA) and ICP-OES (Thermo Scientific, ICAP 7000 series, Bremen, Germany) parameters and measurement conditions.

| Parameter and accessories                         | ICP-OES           | ICP-MS            |
|---------------------------------------------------|-------------------|-------------------|
| Number of replicates                              | 3                 | 3                 |
| Carrier gas                                       | Argon             | Argon             |
| Plasma gas flow rate [L·min <sup>-1</sup> ]       | 12                | 10                |
| Auxiliary gas flow rate [L·min <sup>-1</sup> ]    | 0.5               | 0.76              |
| Nebulization gas flow rate [L·min <sup>-1</sup> ] | 0.5               | 0.9               |
| Torch                                             | Quartz            | Quartz            |
| Nebulizer                                         | Concentric quartz | Concentric quartz |
| Generator power [W]                               | 1150              | 1317              |
| Internal standard                                 | In                | In                |

**Table S2.** Basic validation parameters obtained for each analyte by using developed method (n, number of standards in three replicates,  $R^2$ , coefficient of determination).

| Analyte | n | Equation              | $R^2$ | LOD [ $\mu\text{g/L}$ ] | LOQ [ $\mu\text{g/L}$ ] |
|---------|---|-----------------------|-------|-------------------------|-------------------------|
| Ag      | 7 | $y = 85.67x + 11.36$  | 0.999 | 0.183                   | 0.550                   |
| Al      | 7 | $y = 49.76x + 125.91$ | 0.999 | 0.737                   | 2.212                   |
| B       | 7 | $y = 66.68x + 75.45$  | 0.999 | 0.368                   | 1.105                   |
| Ba      | 7 | $y = 245.09x + 69.55$ | 0.999 | 3.399                   | 10.20                   |
| Be      | 7 | $y = 10.53x + 1.82$   | 0.999 | 0.025                   | 0.074                   |
| Bi      | 7 | $y = 329.78x + 15.00$ | 0.999 | 0.216                   | 0.648                   |
| Cd      | 7 | $y = 20.66x + 0.45$   | 0.999 | 0.057                   | 0.170                   |
| Co      | 7 | $y = 103.62x + 5.9$   | 0.999 | 0.093                   | 0.279                   |
| Cr      | 7 | $y = 78.94x + 49.09$  | 0.999 | 1.848                   | 5.542                   |
| Cu      | 7 | $y = 28.56x + 4.55$   | 0.999 | 2.453                   | 7.360                   |
| Li      | 7 | $y = 32.47x + 1.82$   | 0.999 | 0.116                   | 0.347                   |
| Mn      | 7 | $y = 108.13x + 68.18$ | 0.999 | 0.932                   | 2.796                   |
| Mo      | 7 | $y = 30.54x + 0.45$   | 0.999 | 0.270                   | 0.810                   |
| Ni      | 7 | $y = 23.61x + 1.82$   | 0.999 | 0.948                   | 2.844                   |
| Pb      | 7 | $y = 207.5x + 7.27$   | 0.999 | 2.167                   | 6.502                   |
| Sb      | 7 | $y = 54.38x + 0.45$   | 0.999 | 0.566                   | 1.698                   |
| Sn      | 7 | $y = 62.67x + 4.09$   | 0.999 | 1.468                   | 4.404                   |
| Sr      | 7 | $y = 171.82x + 7.73$  | 0.999 | 4.080                   | 12.24                   |
| Te      | 7 | $y = 4.35x + 0.45$    | 0.999 | 0.008                   | 0.024                   |
| U       | 7 | $y = 431.42x + 0.0$   | 0.999 | 0.008                   | 0.024                   |
| V       | 7 | $y = 102.66x + 62.27$ | 0.999 | 0.068                   | 0.204                   |
| Ca      | 6 | $y = 73844x + 9320$   | 1.00  | 0.033                   | 0.100                   |
| Fe      | 6 | $y = 16219x + 108.6$  | 1.00  | 720.5                   | 2162                    |
| K       | 6 | $y = 186.7x + 146.5$  | 0.999 | 15.00                   | 45.00                   |
| Mg      | 6 | $y = 50432x + 421.8$  | 1.00  | 611.0                   | 1833                    |
| P       | 3 | $y = 282.6x + 0.381$  | 1.00  | 14.00                   | 42.00                   |
| S       | 3 | $y = 576.3x + 17.41$  | 1.00  | 26.00                   | 78.00                   |
| Ti      | 3 | $y = 70413 + 9.800$   | 1.00  | 598.6                   | 1796                    |
| Tl      | 7 | $y = 290.65 + 0.909$  | 0.99  | 4.000                   | 12.00                   |
| Zn      | 6 | $y = 22772 + 520.3$   | 1.00  | 31.00                   | 93.00                   |

**Table S3.** Contents of selected elements (with statistically significant differences) in the measured whisky samples (n = 170) [ $\mu\text{g/L}$ ].

| Element           | Code of country | n   | Mean  | Median | Element              | Code of country | n   | Mean  | Median |
|-------------------|-----------------|-----|-------|--------|----------------------|-----------------|-----|-------|--------|
| $^7\text{Li}$     | SCT             | 106 | 15.58 | 10.60  | $^{121}\text{Sb}$    | SCT             | 106 | 3.660 | < LOQ  |
|                   | USA             | 26  | 44.29 | 24.97  |                      | USA             | 26  | 8.280 | 0.861  |
|                   | IRL             | 15  | 22.62 | 15.67  |                      | IRL             | 15  | 0.310 | 0.114  |
|                   | PL              | 10  | 23.15 | 21.98  |                      | PL              | 10  | 0.330 | 0.170  |
|                   | OTH             | 13  | 19.96 | 13.00  |                      | OTH             | 13  | 2.629 | 0.067  |
| $^9\text{Be}$     | SCT             | 106 | 0.090 | 0.090  | $\text{Zn } 213.856$ | SCT             | 106 | 1065  | 143.3  |
|                   | USA             | 26  | 0.120 | 0.118  |                      | USA             | 26  | 2122  | 571.6  |
|                   | IRL             | 15  | 0.110 | 0.098  |                      | IRL             | 15  | 512.3 | 193.5  |
|                   | PL              | 10  | 0.130 | 0.110  |                      | PL              | 10  | 985.4 | 153.6  |
|                   | OTH             | 13  | 0.139 | 0.137  |                      | OTH             | 13  | 548.2 | 157.6  |
| $^{51}\text{V}$   | SCT             | 106 | 1.080 | 0.870  | $\text{P } 185.942$  | SCT             | 106 | 1347  | 183.0  |
|                   | USA             | 26  | 7.910 | 2.400  |                      | USA             | 26  | 2311  | 913.2  |
|                   | IRL             | 15  | 1.260 | 1.129  |                      | IRL             | 15  | 2393  | 597.4  |
|                   | PL              | 10  | 1.890 | 1.100  |                      | PL              | 10  | 2210  | 803.0  |
|                   | OTH             | 13  | 2.578 | 1.058  |                      | OTH             | 13  | 1199  | 344.6  |
| $^{55}\text{Mn}$  | SCT             | 106 | 49.60 | 34.79  | $^{209}\text{Bi}$    | SCT             | 106 | 1.310 | 0.920  |
|                   | USA             | 26  | 48.55 | 42.47  |                      | USA             | 26  | 1.660 | 0.949  |
|                   | IRL             | 15  | 24.03 | 20.47  |                      | IRL             | 15  | 1.380 | 0.987  |
|                   | PL              | 10  | 86.82 | 33.74  |                      | PL              | 10  | 1.290 | 0.600  |
|                   | OTH             | 13  | 34.25 | 32.05  |                      | OTH             | 13  | 0.491 | 0.436  |
| $^{63}\text{Cu}$  | SCT             | 106 | 584.5 | 375.8  | $\text{Fe } 238.204$ | SCT             | 106 | 154.5 | 94.55  |
|                   | USA             | 26  | 106.3 | 39.15  |                      | USA             | 26  | 248.3 | 176.5  |
|                   | IRL             | 15  | 82.51 | 72.11  |                      | IRL             | 15  | 276.1 | 125.6  |
|                   | PL              | 10  | 201.3 | 228.2  |                      | PL              | 10  | 89.00 | 52.37  |
|                   | OTH             | 13  | 999.2 | 243.3  |                      | OTH             | 13  | 53.01 | 9.994  |
| $^{107}\text{Ag}$ | SCT             | 106 | 5.560 | < LOQ  | $\text{Ti } 334.941$ | SCT             | 106 | 23.79 | 13.21  |
|                   | USA             | 26  | 2.580 | 0.468  |                      | USA             | 26  | 52.91 | 28.14  |
|                   | IRL             | 15  | 0.630 | < LOQ  |                      | IRL             | 15  | 13.47 | 15.98  |
|                   | PL              | 10  | 4.520 | 0.760  |                      | PL              | 10  | 24.33 | < LOQ  |
|                   | OTH             | 13  | 0.971 | 0.360  |                      | OTH             | 13  | 7.628 | < LOQ  |
| $^{111}\text{Cd}$ | SCT             | 106 | 1.310 | 0.840  | $\text{Ca } 393.366$ | SCT             | 106 | 15540 | 10752  |
|                   | USA             | 26  | 1.520 | 0.647  |                      | USA             | 26  | 11359 | 6286   |
|                   | IRL             | 15  | 0.900 | 0.237  |                      | IRL             | 15  | 12068 | 8125   |
|                   | PL              | 10  | 0.840 | 0.350  |                      | PL              | 10  | 23888 | 20929  |
|                   | OTH             | 13  | 0.807 | 0.311  |                      | OTH             | 13  | 8687  | 6275   |
| $^{118}\text{Sn}$ | SCT             | 106 | 7.060 | 3.570  |                      | SCT             | 106 | 15540 | 10752  |
|                   | USA             | 26  | 16.08 | 8.745  |                      | USA             | 26  | 11359 | 6286   |
|                   | IRL             | 15  | 11.52 | 6.803  |                      | IRL             | 15  | 12068 | 8125   |
|                   | PL              | 10  | 15.73 | 7.550  |                      | PL              | 10  | 23888 | 20929  |
|                   | OTH             | 13  | 15.79 | 10.60  |                      | OTH             | 13  | 8687  | 6275   |

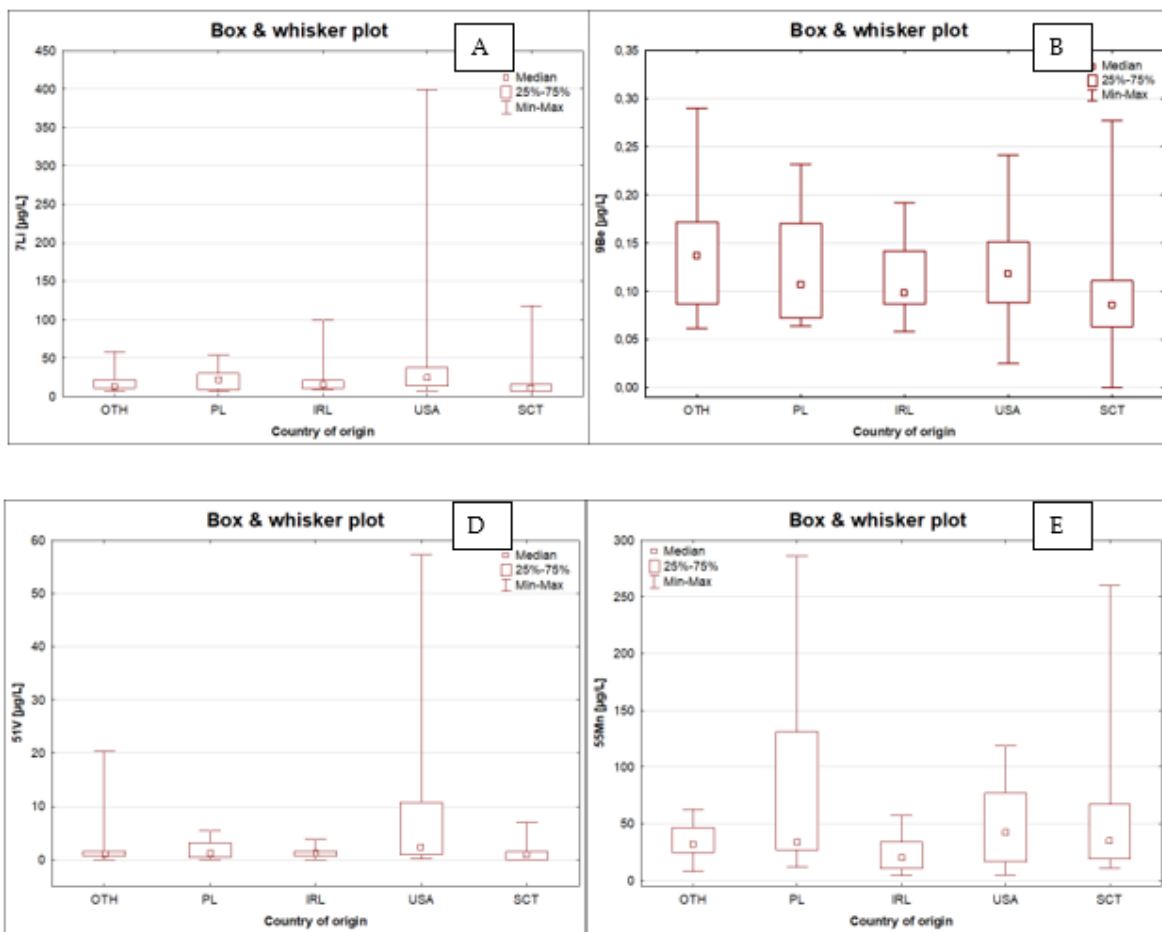

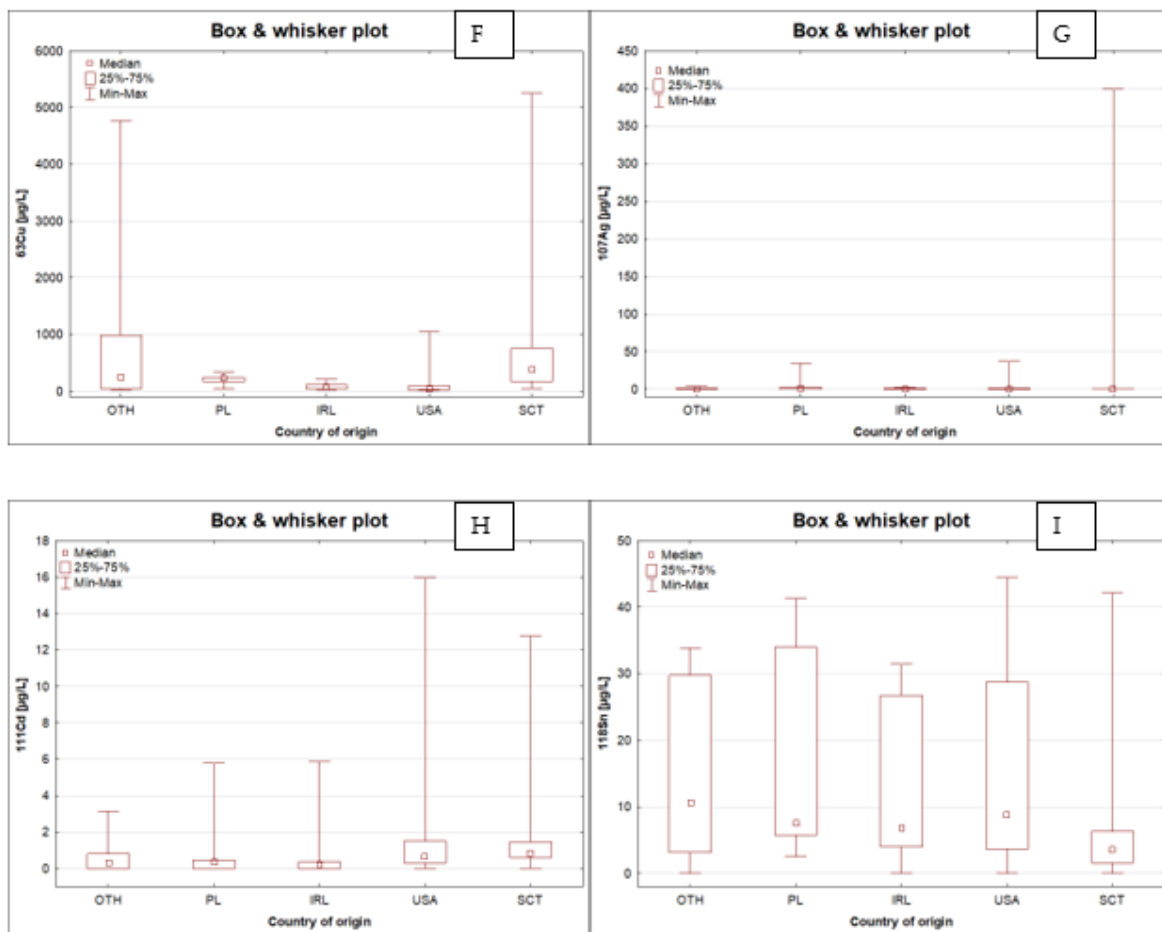

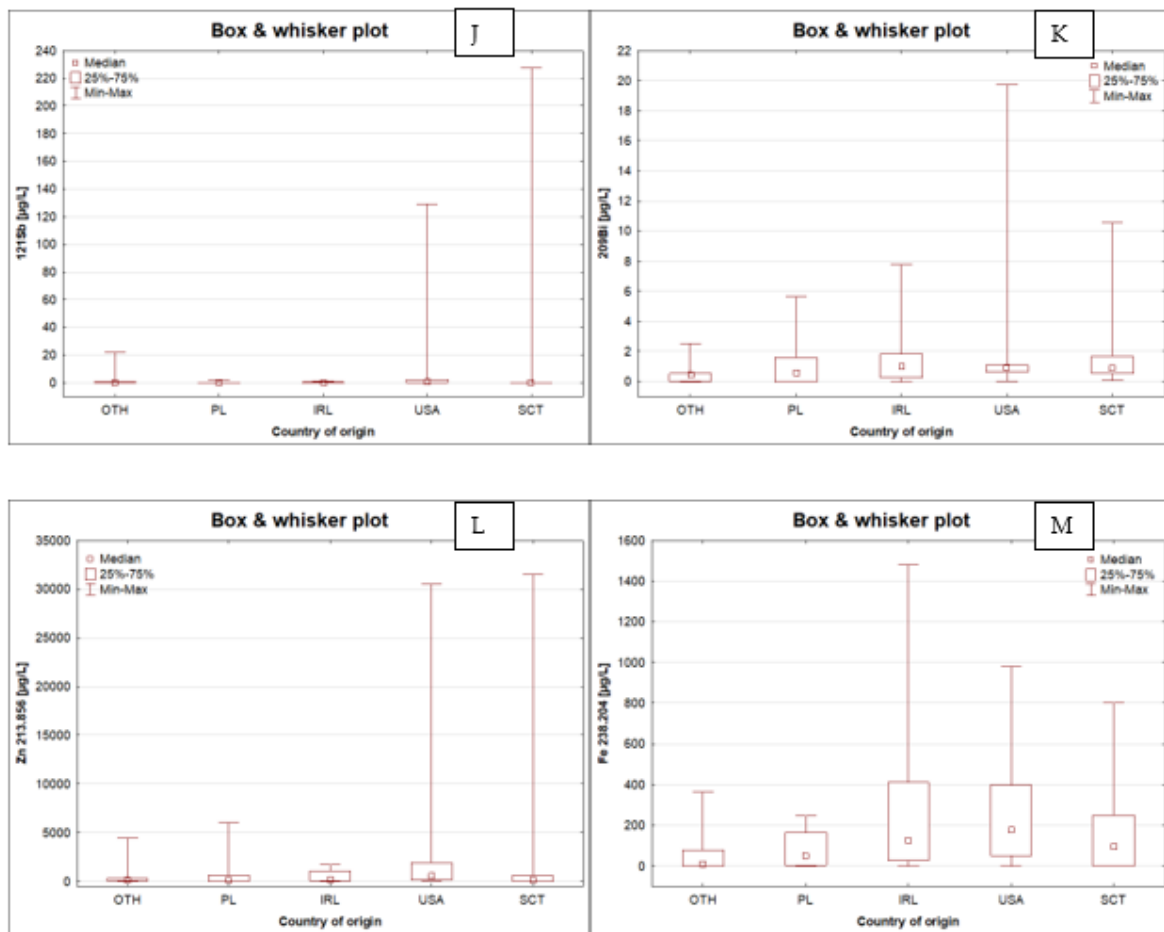

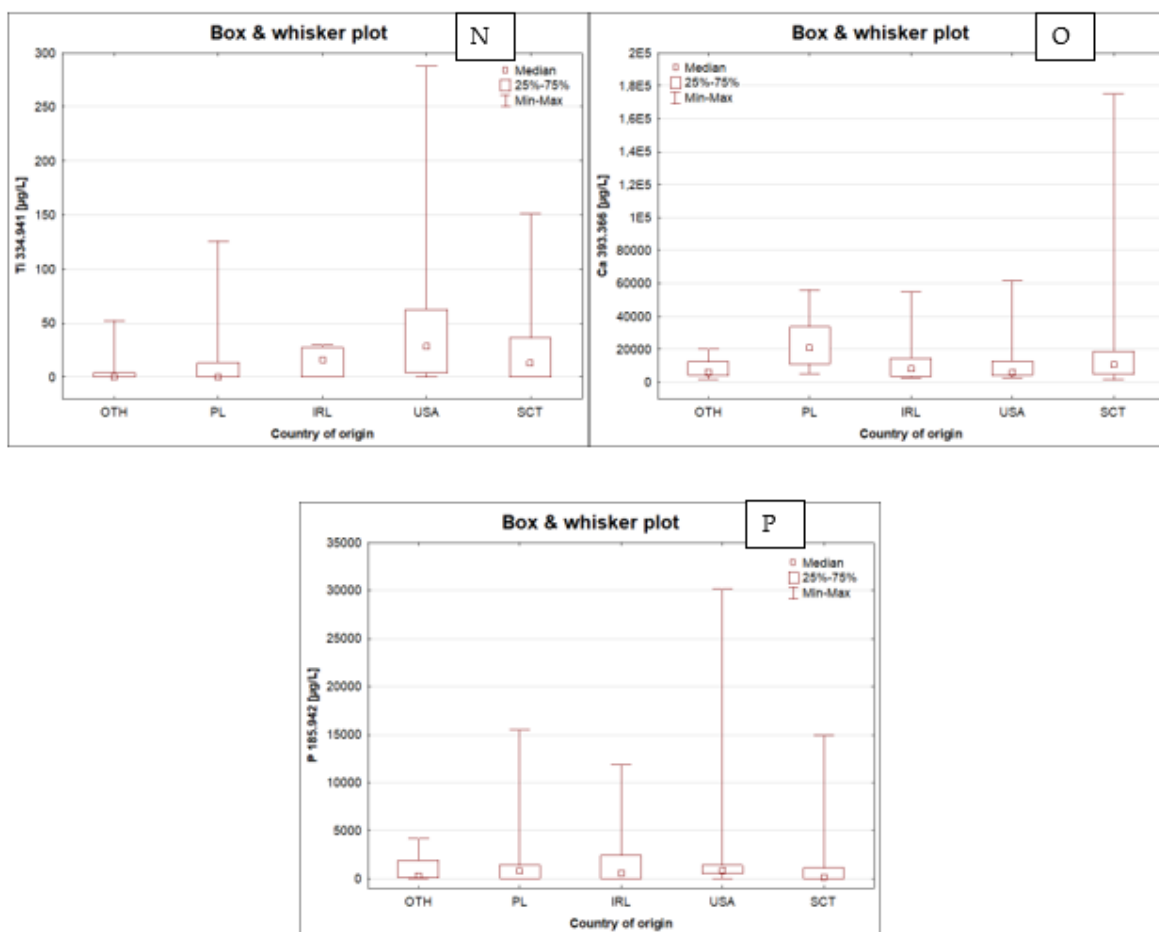

**Figure S1. A-P.** Box & whisker plots of selected elements (with statistically significant differences) in the measured whisky samples ( $n = 170$ ) [ $\mu\text{g/L}$ ].

**Table S4.** Contents of selected elements (with statistically significant differences) in the measured samples from USA division against the brand (n = 26) [ $\mu\text{g/L}$ ].

| Element           | Brand code | n | Mean  | Median | Min    | Max    | Std. Dev. |
|-------------------|------------|---|-------|--------|--------|--------|-----------|
| $^{208}\text{Pb}$ | JB         | 6 | 12.02 | 10.35  | 8.975  | 19.01  | 3.783     |
|                   | Oth        | 9 | 8.396 | 10.29  | 1.243  | 15.27  | 4.871     |
|                   | JD         | 6 | 14.77 | 13.44  | 9.942  | 22.31  | 5.061     |
|                   | Ole        | 3 | 2.590 | 2.650  | 0.283  | 4.836  | 2.277     |
|                   | WiIT       | 2 | 24.09 | 24.02  | 12.20  | 35.84  | 16.72     |
| $^{238}\text{U}$  | JB         | 6 | 0.479 | 0.428  | 0.306  | 0.704  | 0.1632    |
|                   | Oth        | 9 | 0.224 | 0.190  | 0.055  | 0.593  | 0.1714    |
|                   | JD         | 6 | 0.336 | 0.300  | 0.105  | 0.593  | 0.1713    |
|                   | Ole        | 3 | 0.049 | 0.045  | < LOQ  | 0.101  | 0.050     |
|                   | WiIT       | 2 | 0.097 | 0.097  | 0.040  | 0.155  | 0.081     |
| $^{55}\text{Mn}$  | JB         | 6 | 58.64 | 67.29  | 29.29  | 78.02  | 19.29     |
|                   | Oth        | 9 | 66.43 | 77.23  | 16.61  | 118.5  | 32.29     |
|                   | JD         | 6 | 18.39 | 16.64  | 4.809  | 35.70  | 13.06     |
|                   | Ole        | 3 | 14.38 | 15.48  | 11.52  | 16.14  | 2.495     |
|                   | WiIT       | 2 | 79.51 | 79.51  | 64.28  | 94.74  | 21.54     |
| $^{95}\text{Mo}$  | JB         | 6 | 7.731 | 7.701  | 2.252  | 15.748 | 4.6420    |
|                   | Oth        | 9 | 0.841 | 0.022  | 0.0010 | 2.946  | 1.2146    |
|                   | JD         | 6 | 2.161 | 2.0577 | 0.0010 | 5.701  | 2.0880    |
|                   | Ole        | 3 | < LOQ | < LOQ  | < LOQ  | < LOQ  | < LOQ     |
|                   | WiIT       | 2 | 0.751 | 0.751  | < LOQ  | 1.502  | 1.061     |
| Mg 279.553        | JB         | 6 | 1409  | 1374   | 1004   | 1843   | 385.8     |
|                   | Oth        | 9 | 1487  | 1413   | 912.9  | 1973   | 341.5     |
|                   | JD         | 6 | 788.9 | 824.2  | 317.3  | 1194   | 298.5     |
|                   | Ole        | 3 | 2469  | 2318   | 1246   | 3844   | 1306      |
|                   | WiIT       | 2 | 964.4 | 964.4  | 698.8  | 1230   | 375.7     |

**Table S5.** Contents of B in the measured samples from Ireland division against the brand (n = 15) [µg/L].

| Brand code. | n | Mean | Median | Min   | Max  | Std. Dev. |
|-------------|---|------|--------|-------|------|-----------|
| Bus         | 7 | 3599 | 3975   | 925.6 | 5368 | 1865      |
| Jam         | 3 | 8209 | 8148   | 8065  | 8396 | 172.2     |
| Tul         | 2 | 4061 | 4061   | 2371  | 5752 | 2391      |
| Oth         | 3 | 5801 | 6457   | 3193  | 7754 | 2350      |

**Table S6.** Contents of selected elements (with statistically significant differences) in the measured Scottish whisky (n = 106) [µg/L].

| Elements          | Type of Scotch whisky | n  | Mean  | Median | Min   | Max    | Std. Dev. |
|-------------------|-----------------------|----|-------|--------|-------|--------|-----------|
| <sup>27</sup> Al  | B                     | 56 | 129.3 | 138.4  | < LOQ | 262.4  | 72.12     |
|                   | SM                    | 50 | 92.19 | 77.39  | < LOQ | 225.3  | 61.88     |
| <sup>51</sup> V   | B                     | 56 | 0.681 | 0.281  | < LOQ | 7.060  | 1.098     |
|                   | SM                    | 50 | 1.530 | 1.330  | < LOQ | 5.700  | 1.240     |
| <sup>52</sup> Cr  | B                     | 56 | 173.2 | 111.4  | 53.83 | 666.1  | 135.0     |
|                   | SM                    | 50 | 62.59 | 66.69  | 10.70 | 108.6  | 27.69     |
| <sup>55</sup> Mn  | B                     | 56 | 24.34 | 21.90  | 11.28 | 63.35  | 10.66     |
|                   | SM                    | 50 | 77.90 | 71.14  | 16.85 | 260.1  | 47.44     |
| <sup>63</sup> Cu  | B                     | 56 | 284.3 | 187.9  | 48.55 | 2381   | 332.7     |
|                   | SM                    | 50 | 920.7 | 663.1  | 143.2 | 5252   | 817.8     |
| <sup>205</sup> Tl | B                     | 56 | 0.130 | 0.046  | < LOQ | 2.580  | 0.357     |
|                   | SM                    | 50 | 0.09  | 0.02   | < LOQ | 1.500  | 0.230     |
| Zn 213.856        | B                     | 56 | 417.9 | 97.62  | < LOQ | 4921   | 946.5     |
|                   | SM                    | 50 | 1790  | 195.8  | < LOQ | 31458  | 4917      |
| Fe 238.204        | B                     | 56 | 70.51 | 6.065  | < LOQ | 473.0  | 109.4     |
|                   | SM                    | 50 | 248.7 | 223.3  | < LOQ | 802.3  | 217.7     |
| Mg 279.553        | B                     | 56 | 874.0 | 812.3  | 208.5 | 3140   | 530.9     |
|                   | SM                    | 50 | 2005  | 1612   | 228.7 | 5833   | 1447      |
| S 180.731         | B                     | 56 | 3931  | 3552   | 296.4 | 26663  | 3701      |
|                   | SM                    | 50 | 12680 | 9742   | 1610  | 69907  | 13167     |
| P 185.942         | B                     | 56 | 339.8 | 109.3  | < LOQ | 5130   | 829.9     |
|                   | SM                    | 50 | 2476  | 974.9  | < LOQ | 14875  | 3459      |
| K 766.490         | B                     | 56 | 9042  | 7379   | < LOQ | 23316  | 5415      |
|                   | SM                    | 50 | 29669 | 19596  | < LOQ | 149302 | 29246     |
| Ti 334.941        | B                     | 56 | 18.80 | 6.601  | < LOQ | 149.0  | 29.57     |
|                   | SM                    | 50 | 29.37 | 14.70  | < LOQ | 151.1  | 35.79     |



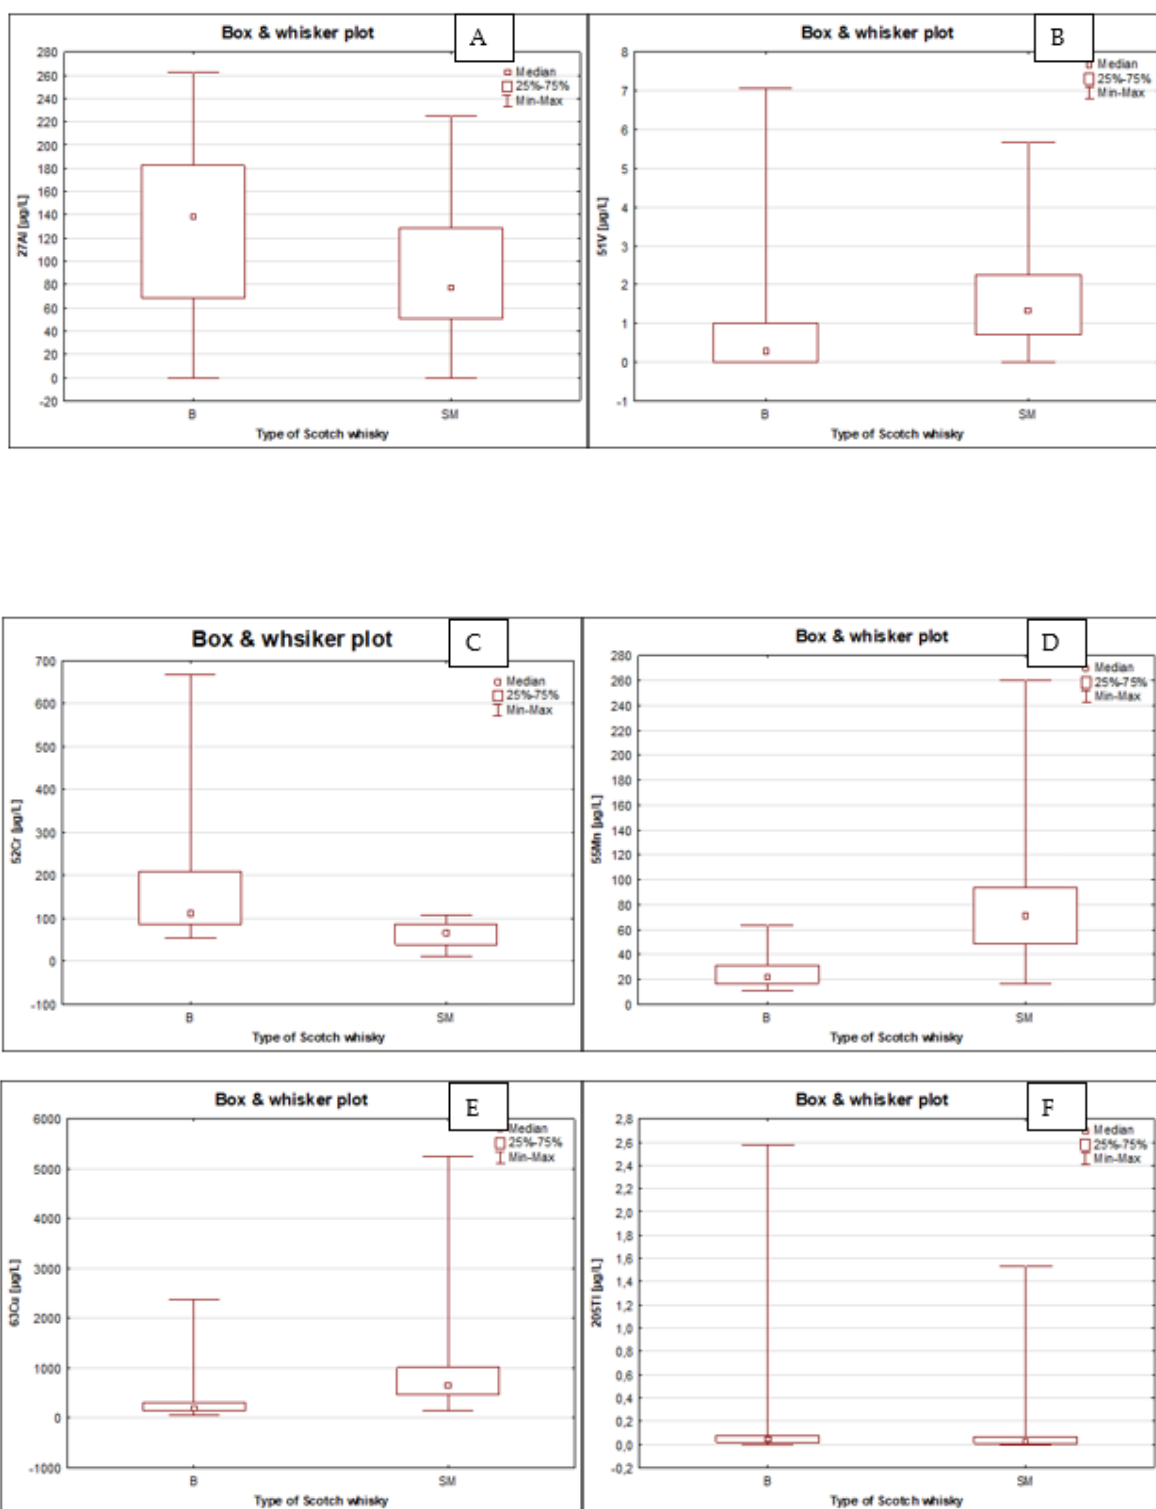

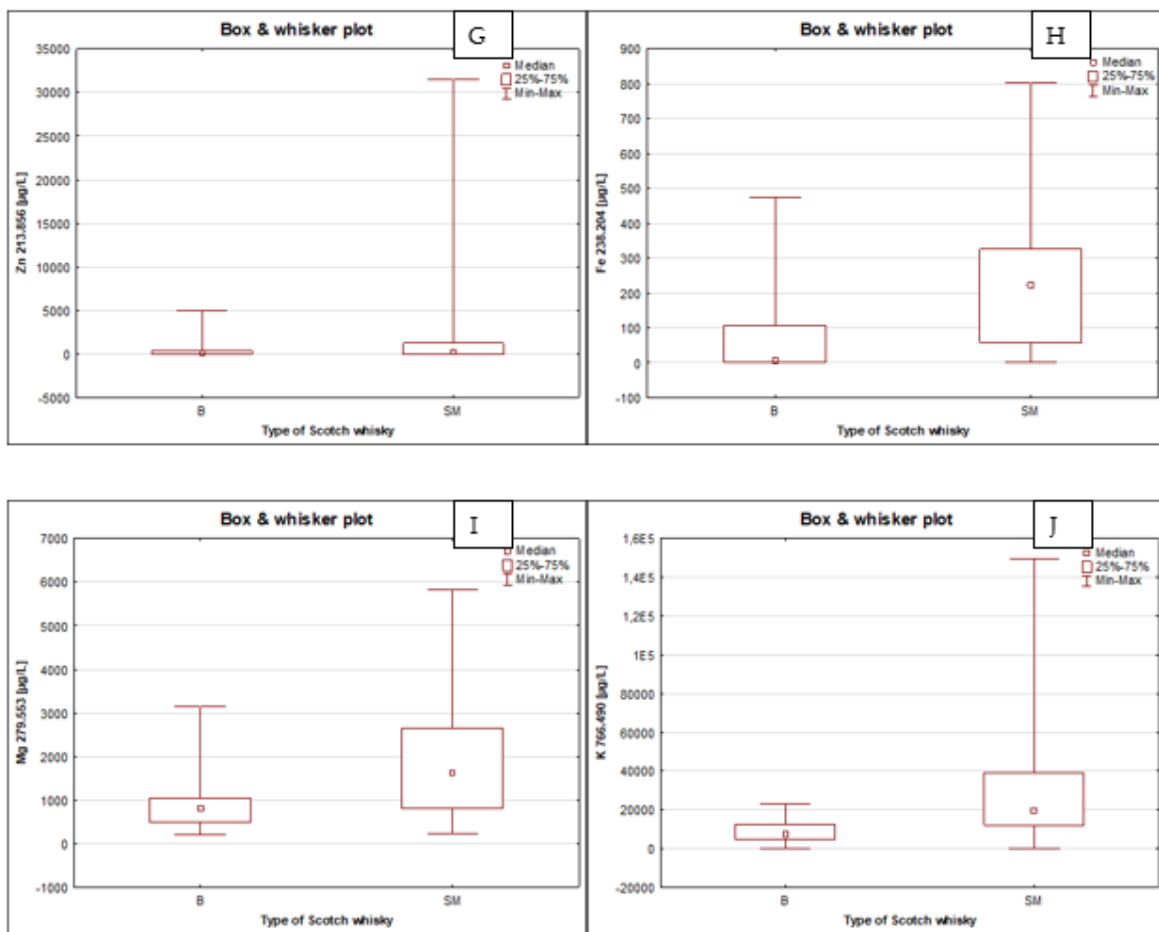

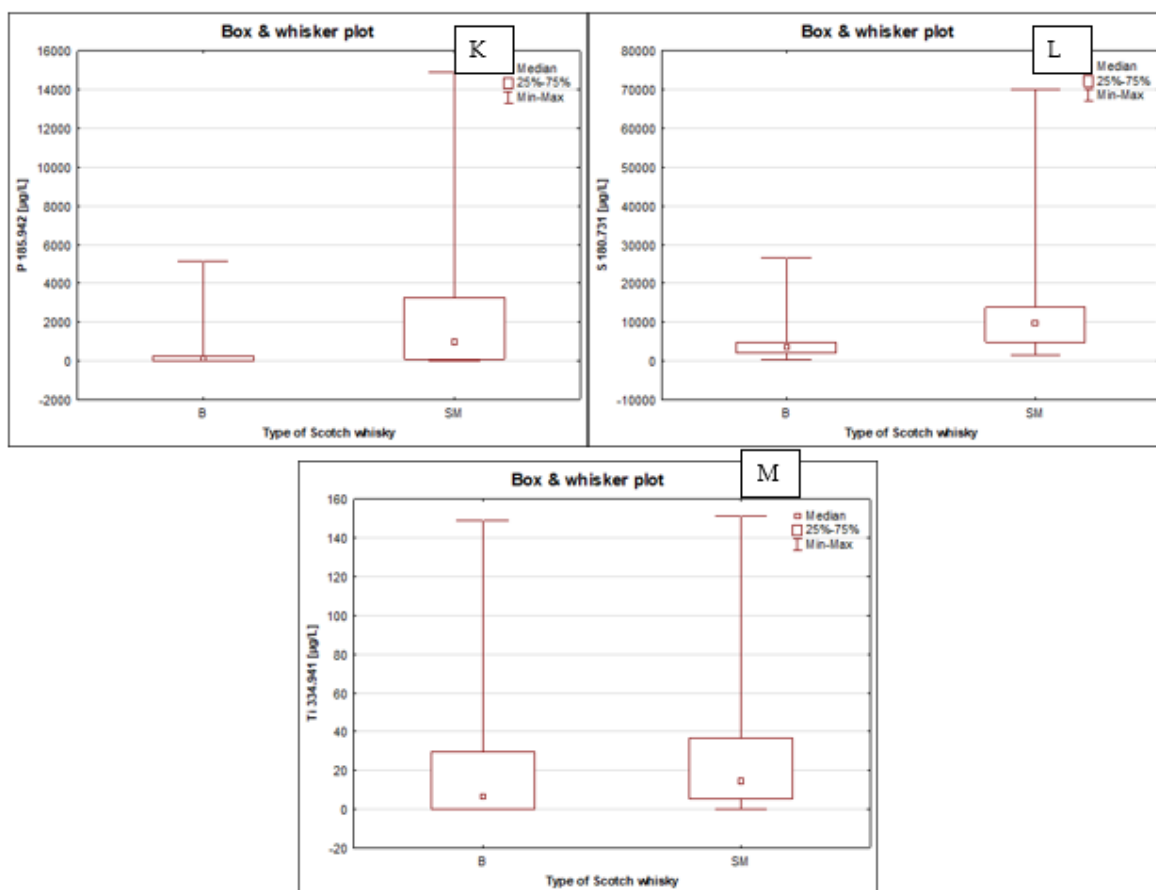

**Figure S2.** A-K. Box & whisker plots of selected elements (with statistically significant differences) in the measured Scottish whisky ( $n = 106$ ) [ $\mu\text{g/L}$ ].

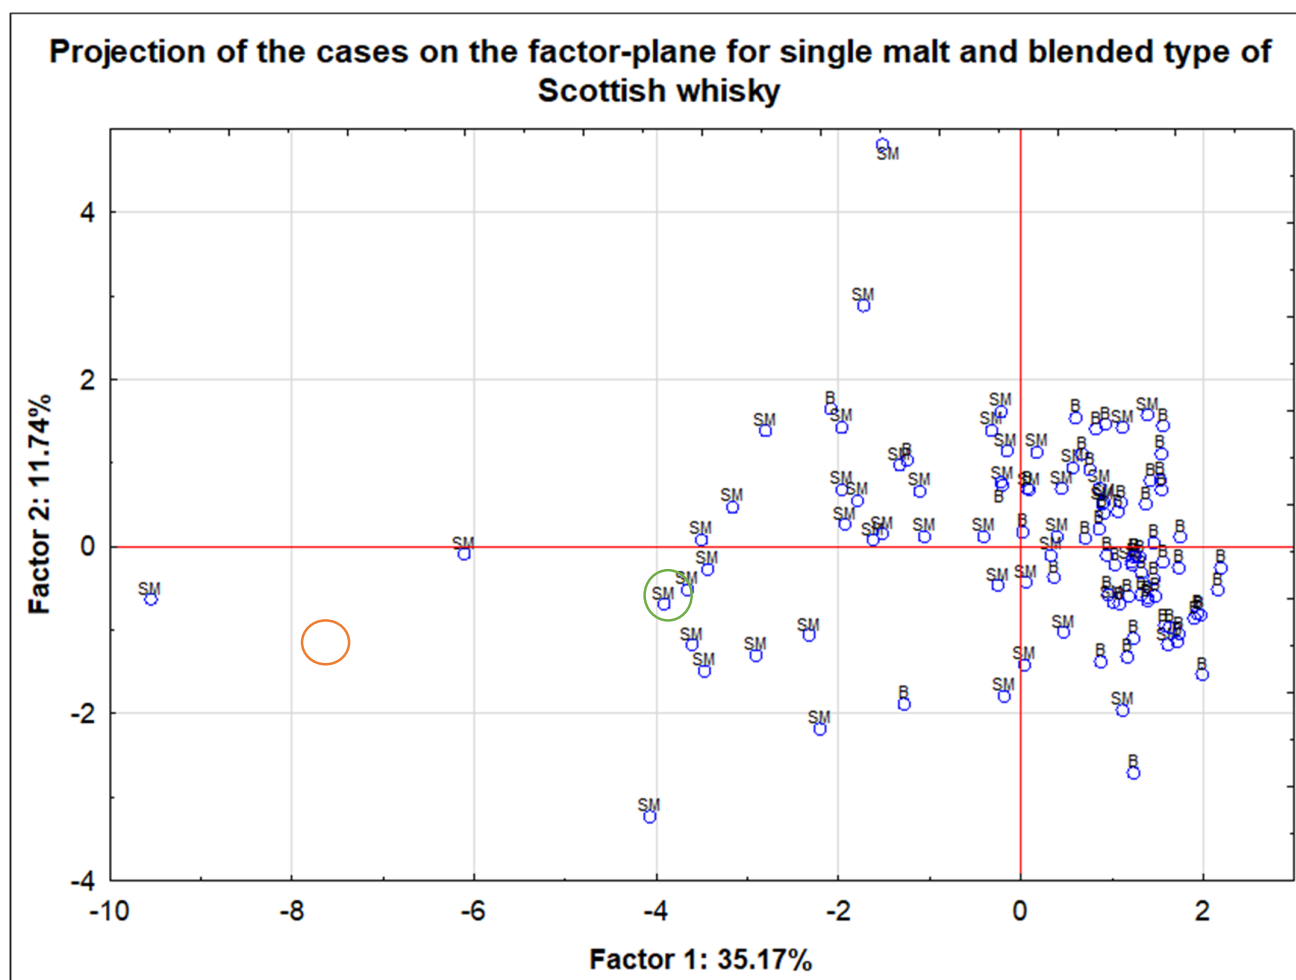

**Figure S3.** Projection of the cases on the factor-plane for 106 samples from Scotland according to their type (single malt (SM) and blended (B)).

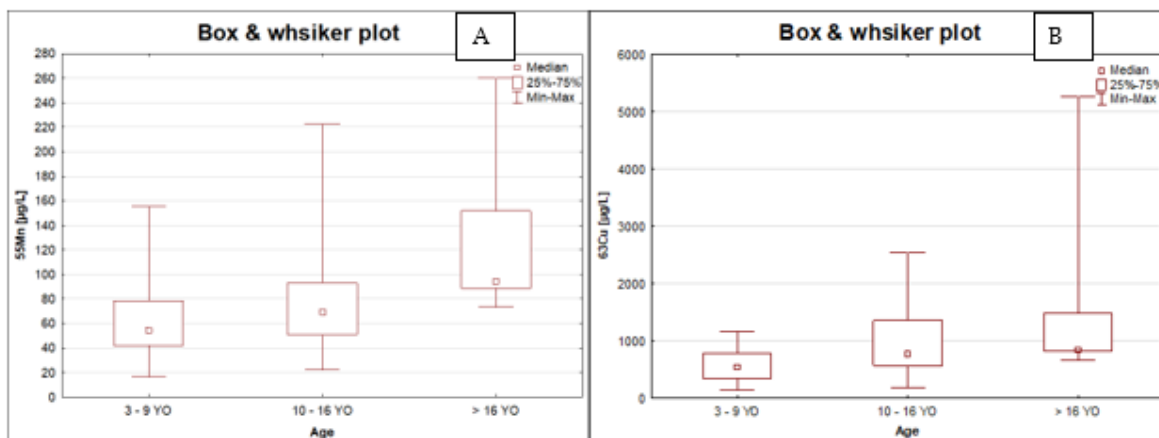

**Figure S4.** A-B. Box & whisker plots of selected elements (with statistically significant differences) in the measured Scottish single malt whisky (n = 50) [µg/L].

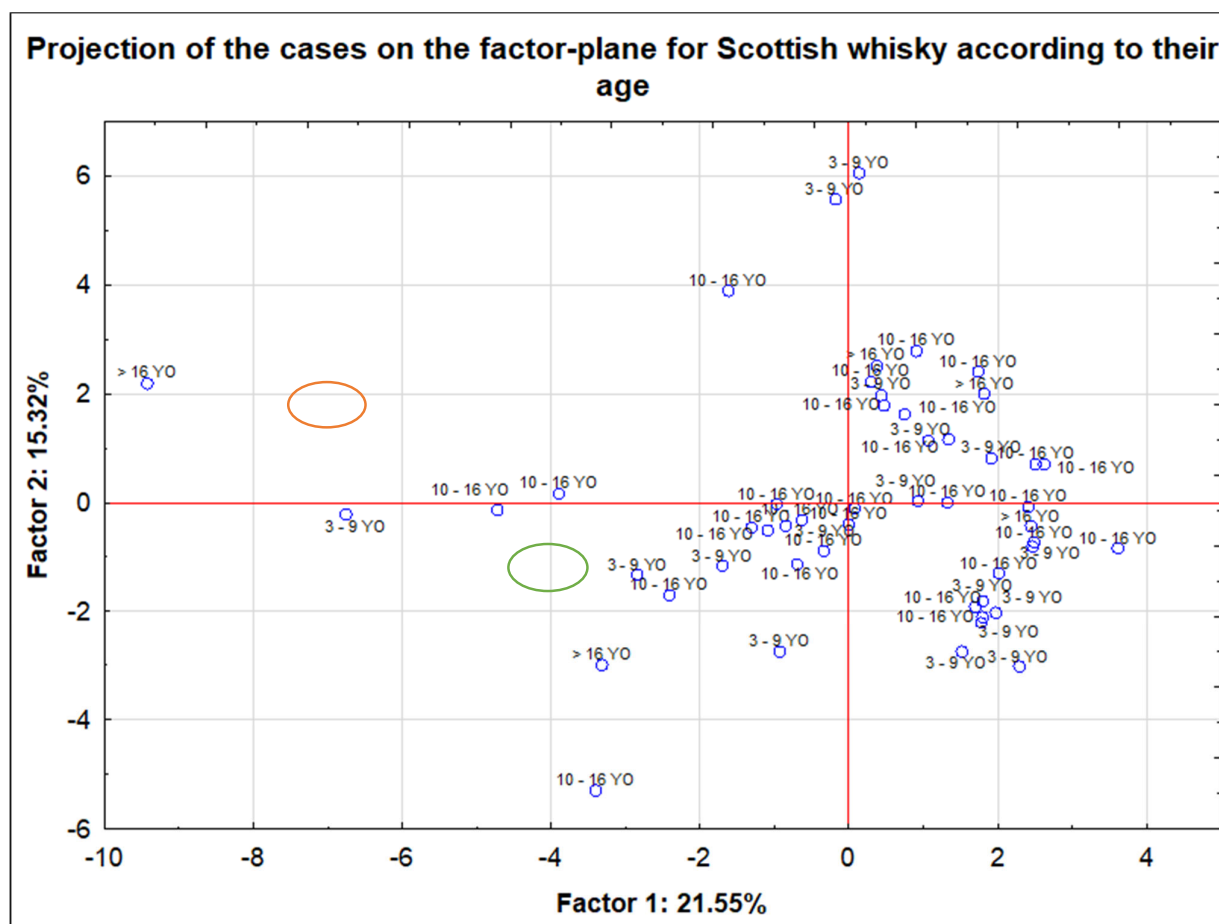

**Figure S5.** Projection of the cases on the factor-plane for 50 samples of single malt whisky from Scotland.
